# Supplementary material for: Marshland restoration benefits Collembola recruitment: a long-term chronosequence study in Sanjiang mire marshland, China
Source: PeerJ. 2019 Jun 27;7:e7198. doi: 10.7717/peerj.7198 (PMC6599674; doi:10.7717/peerj.7198)
Supplement: Supplemental Information 5 — Capital letters indicate a significant effect among habitats and lowercase letters indicate a significant effect in the same habitat based on LSD test (repeated measurement ANOVA; P<0.05). Ind/m2: individuals/m2. [file peerj-07-7198-s005.docx]

|  |  | **IM** | **CU15** | **RE06** | **RE12** | ***F*-Value** | ***p*-Value** |
| --- | --- | --- | --- | --- | --- | --- | --- |
| Density (ind./m2) | Epi-edahpic | 1027±428Cc | 1817±469Bb | 1538±482BCb | 2640±779Ab | 7.24 | 0.001 |
| Hemi-edaphic | 2240±543Ab | 442±172Cc | 1562±508Bb | 2387±536Ab | 16.20 | <0.001 |
| Eu-edaphic | 5812±1250Aa | 2929±957Ba | 2602±709Ba | 4461±893Aa | 8.32 | <0.001 |
|  |  |  |  |  |  |  |

**Table S4.** Effects of marshland management on density (mean ± SE) of Collembola with three typical life-forms (Epi-, Hemi- and Eu-edaphic). Capital letters indicate a significant effect among habitats and lowercase letters indicate a significant effect in the same habitat based on LSD test (repeated measurement ANOVA; P<0.05). Ind/m2: individuals/m2.
